# Supplementary material
Source: PubMed Central journal article supplement (PMC4443349)
Supplement: pnas.1504725112.sapp.pdf [file pnas.1504725112.sapp.pdf]

## **SI Materials and Methods**

**Complete Genome Assembly of Strain SGBS001.** Genomic DNA from overnight culture was isolated using a phenol/chloroform extraction protocol and subjected to large-insert PacBio library preparation following the User Bulletin – Guideline for Preparing 20 kb SMRTbell™ Templates (version 2) and Procedure and Checklist – 20kb Template Preparation Using BluePippin Size-Selection (Version 3) (<http://www.pacificbiosciences.com/support/pubmap/documentation.html>). SMRTbell templates were subjected to standard SMRT sequencing using an engineered phi29 DNA polymerase on the PacBio RS system according to the manufacturer's protocol. Subsequently, paired end sequencing reads derived from short-read Illumina HiSeq data were mapped to the newly assembled contig for error correction of the PacBio data (1). Annotation of the closed SGBS001 genome was performed using RAST (2) and BASYS (3) in addition to homologous annotation transfer from the previously sequenced 2603V/R genome (accession number NC\_004116) using CLCBio Genomics Workbench version 7.0.3 (Qiagen). The GenBank accession number for the SGBS001 genome is CP010867.

**Identification of Genes with an Excess of Polymorphisms.** To identify genes possibly under positive selection, we sought to determine whether any of the 1,931 core ST-1 genes had a higher number of SNPs than expected for a random distribution as previously described (4). The expected numbers of SNPs was calculated for all core genes and corrected for the size of the gene relative to the core genome. The resulting  $\chi^2$  probabilities were then corrected for multiple testing using the Bonferroni method (Table 1).

**Transcriptome Analysis Using RNASeq.** For RNA-Seq analysis, strains were grown in quadruplicate to mid-exponential phase and RNA was isolated using a RNeasy kit (Qiagen). RNA integrity was confirmed using an Agilent Bioanalyzer. First and second strand cDNA synthesis was performed on 500 ng of rRNA depleted RNA using the Ovation Prokaryotic RNA-Seq System (NuGEN). The resulting cDNA was fragmented to 200 bp (mean fragment size) with the S220 Focused-ultrasonicator (Covaris) and used to make barcoded sequencing libraries on the SPRI-TE Nucleic Acid Extractor (Beckman-Coulter). No size selection was employed. Libraries were quantitated by qPCR (KAPA Systems), multiplexed and 8 samples per lane were sequenced on the HiSeq2000 using 76 bp paired-end sequencing. The raw reads in FASTQ format were aligned to the SGBS001 genome using Mosaik alignment software (version: 1.1.0021, <http://code.google.com/p/mosaik-aligner/>) with the following alignment parameters: 8 percent maximal percentage read length allowed to be errors and 50 percent minimal percentage of the read length aligned. Duplicate fragments with a lower alignment quality were discarded. Next, the overlaps between aligned reads and annotated genes were counted using HTSeq software (<http://www-huber.embl.de/users/anders/HTSeq/doc/overview.html>). If the number of overlapped read of any given gene was less than one per million total mapped read for all samples, this gene was excluded from further analysis. The gene counts were normalized using the scaling factor method (5). A negative binomial generalized linear model was fitted to each gene. Then a likelihood-ratio test was applied to examine if there was a difference in the gene transcript levels among the compared strains (5). The Benjamini-Hochberg method was used to control false discovery rate (FDR) (6). Next, pair-wise comparisons using the likelihood ratio test were performed to compare the gene transcript levels between pairs of strains with the Holm's method used to calculate adjusted *P*-values to correct for multiple testing. Transcript

levels were considered significantly different only if the mean transcript level difference was  $\geq$  1.5-fold and the final, adjusted  $P$  value was less than 0.05.

#### SI Material and Methods References

1. Koren S, *et al.* (2013) Reducing assembly complexity of microbial genomes with single-molecule sequencing. *Genome Biol* 14(9):R101.
2. Aziz RK, *et al.* (2008) The RAST Server: rapid annotations using subsystems technology. *BMC Genomics* 9:75.
3. Van Domselaar GH, *et al.* (2005) BASys: a web server for automated bacterial genome annotation. *Nucleic Acids Res* 33(Web Server issue):W455-459.
4. Beres SB, *et al.* (2010) Molecular complexity of successive bacterial epidemics deconvoluted by comparative pathogenomics. *Proc Natl Acad Sci U S A* 107(9):4371-4376.
5. Anders S & Huber W (2010) Differential expression analysis for sequence count data. *Genome Biol* 11(10):R106.
6. Reiner A, Yekutieli D, & Benjamini Y (2003) Identifying differentially expressed genes using false discovery rate controlling procedures. *Bioinformatics* 19(3):368-375.

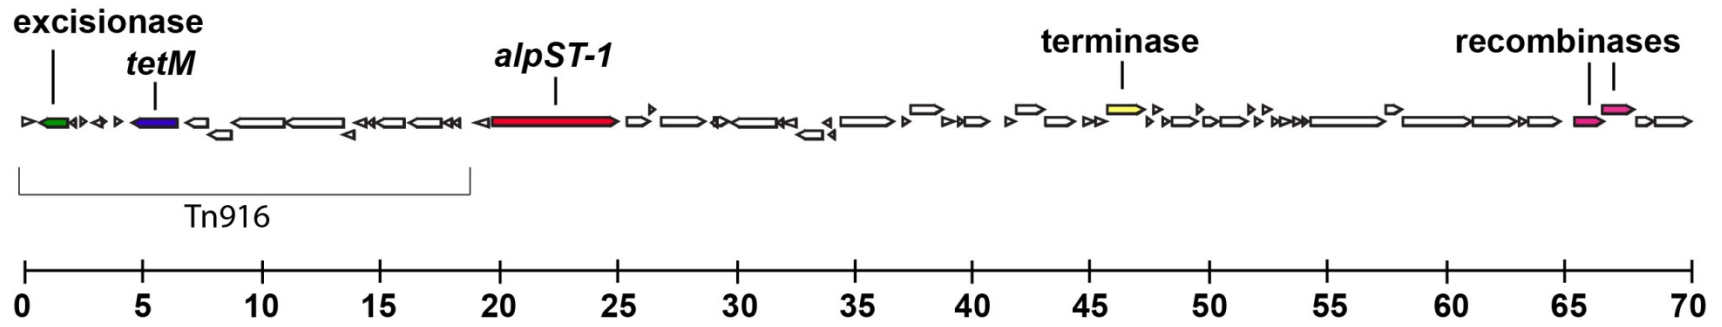

**Fig. S1.** Map of RDF.2 from SGBS001. Scale is in kilobases.

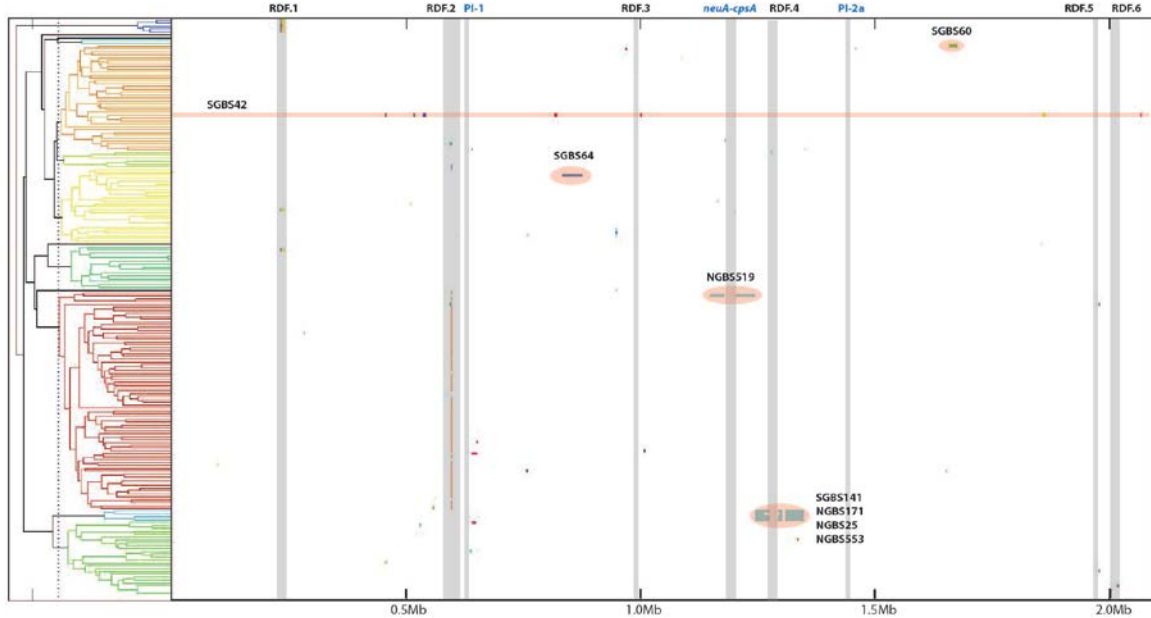

**Fig. S2.** Identified regions of potential recombination in ST-1 GBS. Proportion of shared ancestry (PSA) tree and recombinogenic segments were determined by BratNextGen. PSA clusters based on 202 GBS ST-1 pseudogenomes are displayed on left. The SGBS001 genome position is given on the bottom of the figure. Highlighted (gray) are regions of the reference genome including mobile genetic elements (RDF.1 – RDF.6), pilus islands (PI-1, PI-2a), and the capsule biosynthesis locus (*neuA-cpsA*). Also highlighted (salmon) are the recombinogenic segments of GBS strains showing greater phylogenetic distance from the core ST1 cluster (Fig. 3B).

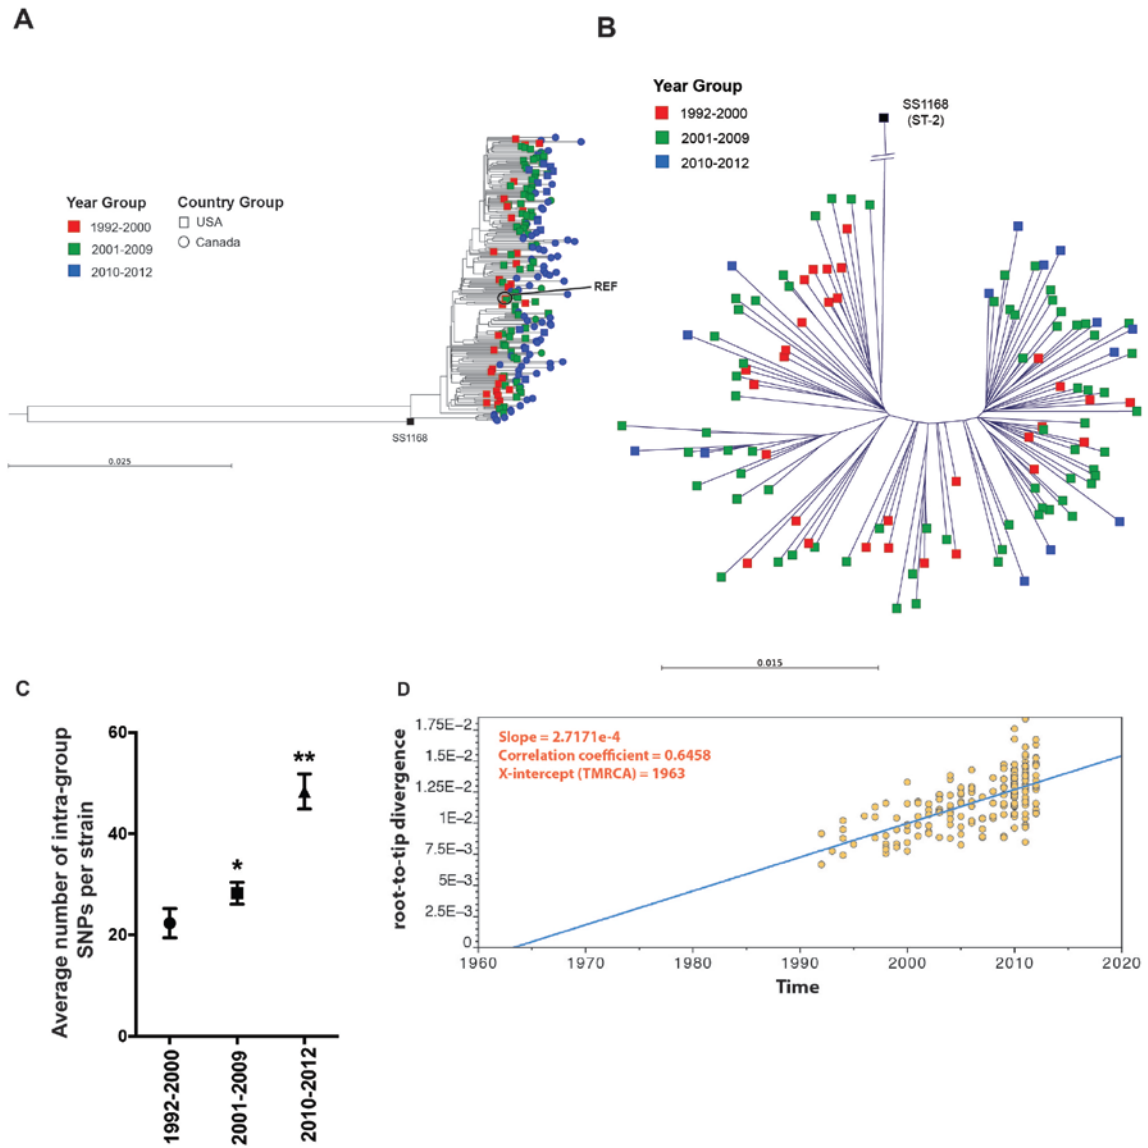

**Fig. S3.** (A) Phylogram of neighbor-joining tree of 194 ST-1 strains lacking evidence of recombination. Shape and color of strains are as indicated in legend. Genetic distance is indicated by in-laid bar. Data are the same as for Fig. 3D except using a phylogram rather than a radial tree depiction. (B) Neighbor-joining tree of all Houston isolated strains after excluding strains with potential recombination. The year of isolation of

individual strains is noted in the legend. In-laid bar represents genetic distance. (C) Graph plotting the mean  $\pm$  standard deviation of the number of intra-group SNPs per strain stratified by indicated time group. Asterisks indicate  $P < 0.0001$  relative to 1992-2000 (\*) and  $P < 0.0001$  relative to both 1992-2000 and 2001-2010 (\*\*) as determined Mann-Whitney U-test. (D) Estimation of the year of origin inferred from 194 ST-1 strains based on 5,880 concatenated core SNPs by neighbor joining. Illustrated is the best fit of the root-to-tip divergence for each of the strains as determined by Path-O-Gen. The X-intercept (1963) is the best estimate of the time of origin of the most recent common serotype V, ST-1 ancestor.

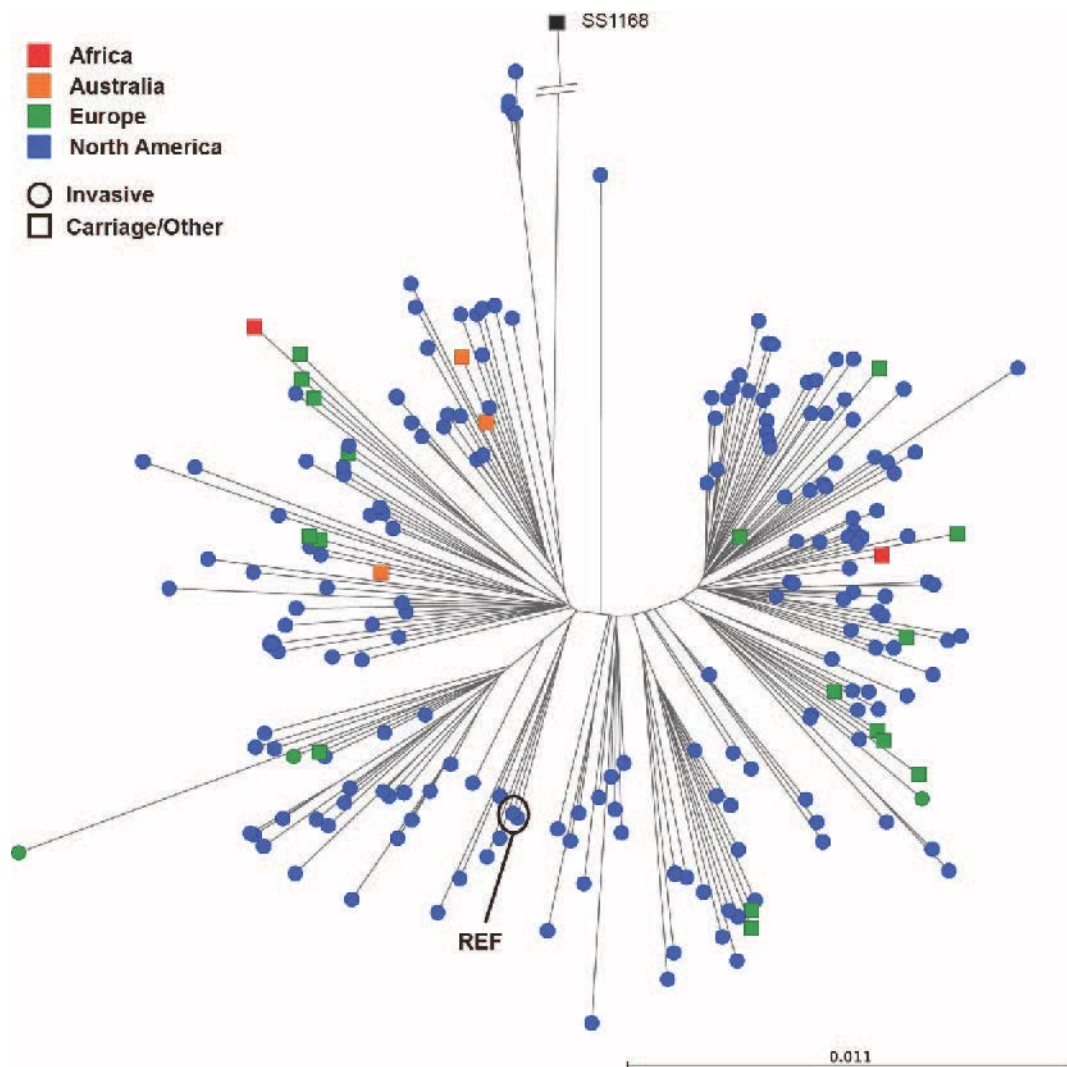

**Fig. S4.** Rooted neighbor joining tree of 194 North American ST-1 strains from this study (as depicted in Fig. 3D) along with 24 serotype V, ST-1 strains from (10). The strains from this study were all isolated in North America and are in blue whereas strains from (10) were isolated in Europe, Africa, or Australia as indicated in the legend. All strains from this study were invasive and thus are depicted by a circle. The strains from (10) were either invasive (circle) or colonizers/unknown clinical status (squares).



**A**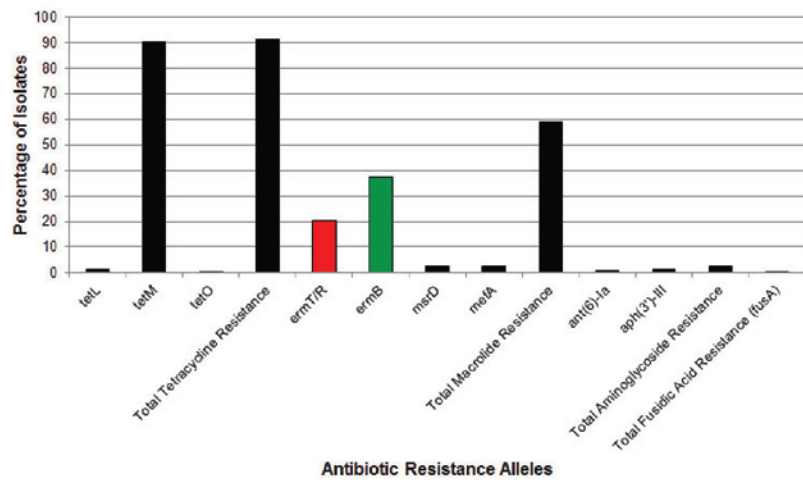**B**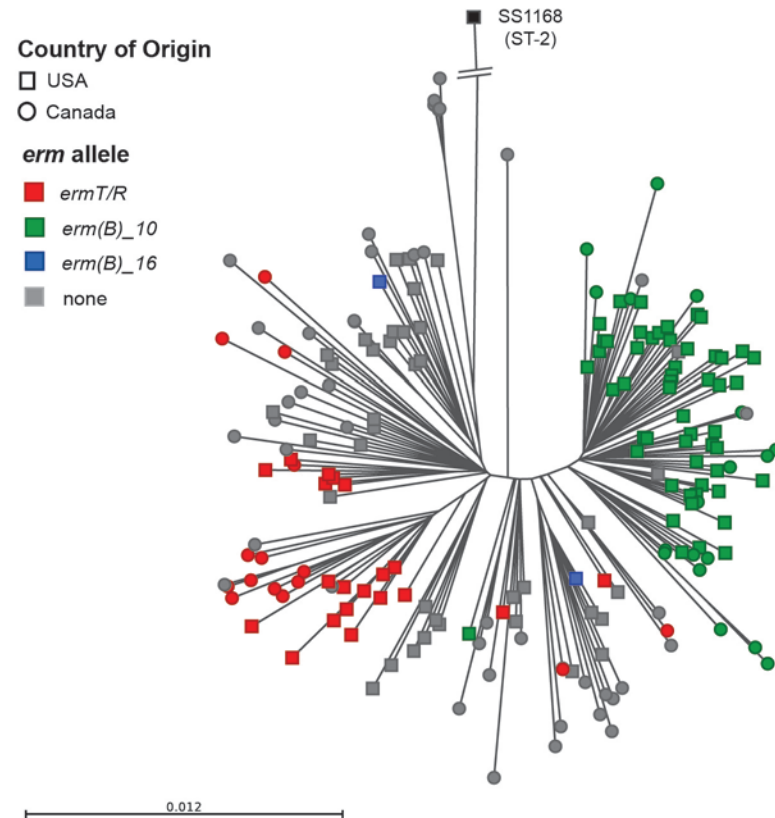

**Fig. S5.** Summary of antimicrobial resistance elements identified in ST-1 strains. (A) Antimicrobial resistance determinants were determined among sequenced serotype V, ST-1 strains using RESFINDER. Y-axis indicates percent of isolates with given

antimicrobial resistance determinant. (B) *erm* alleles are indicated along with phylogenetic relationships as determined in Fig. 3D. Country of origin of strains and *erm* alleles are as indicated in legend. Note clustering of strains with *ermT/R* and *ermB\_10* alleles suggesting single insertion events. *ermB\_10* containing strains had the *ermB* gene located in Tn3872 which appeared to have occurred from a single recombination event of Tn917 into Tn916 to create Tn3872 as described by Da Cunha et al. (10).

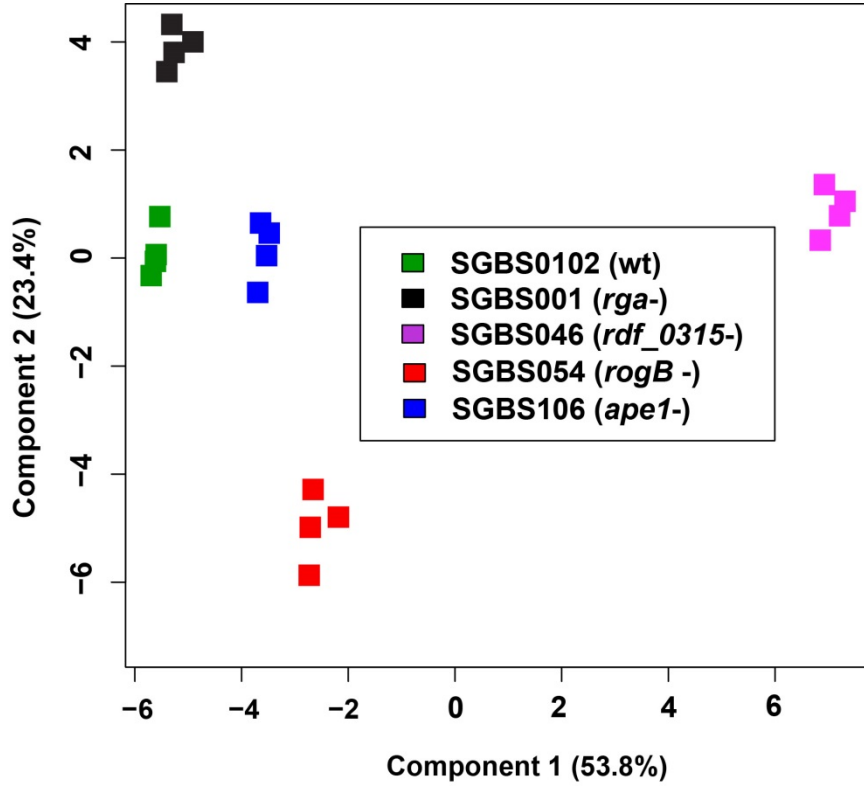

**Fig. S6.** Principal components analysis (PCA) of RNAseq data. PCA showing inter-sample variation of quadruplicate replicates of indicated strains grown to mid-exponential in TH broth. Strain numbers and phenotype are indicated in the legend. % values refer to amount of variation explained by each axis.

Table S1. List of strains used in this study.

| <b>Strain</b> | <b>Year of isolation</b> | <b>Location of isolation</b> | <b>MLST</b> | <b>Genotype<sup>a</sup> (if applicable)</b> |
|---------------|--------------------------|------------------------------|-------------|---------------------------------------------|
| NGBS008       | 2009                     | Toronto, CA                  | 1           |                                             |
| NGBS009       | 2010                     | Toronto, CA                  | 1           |                                             |
| NGBS010       | 2009                     | Toronto, CA                  | 1           |                                             |
| NGBS021       | 2009                     | Toronto, CA                  | 1           |                                             |
| NGBS022       | 2009                     | Toronto, CA                  | 1           |                                             |
| NGBS025       | 2009                     | Toronto, CA                  | 1           |                                             |
| NGBS028       | 2009                     | Toronto, CA                  | 1           |                                             |
| NGBS030       | 2010                     | Toronto, CA                  | 1           |                                             |
| NGBS035       | 2010                     | Toronto, CA                  | 1           |                                             |
| NGBS044       | 2010                     | Toronto, CA                  | 1           |                                             |
| NGBS054       | 2010                     | Toronto, CA                  | 1           |                                             |
| NGBS063       | 2010                     | Toronto, CA                  | 1           |                                             |
| NGBS068       | 2010                     | Toronto, CA                  | 1           |                                             |
| NGBS092       | 2010                     | Toronto, CA                  | 1           |                                             |
| NGBS093       | 2010                     | Toronto, CA                  | 1           |                                             |
| NGBS094       | 2010                     | Toronto, CA                  | 1           |                                             |
| NGBS099       | 2010                     | Toronto, CA                  | 1           |                                             |
| NGBS107       | 2010                     | Toronto, CA                  | 1           |                                             |
| NGBS110       | 2010                     | Toronto, CA                  | 1           |                                             |
| NGBS117       | 2010                     | Toronto, CA                  | 1           |                                             |
| NGBS134       | 2010                     | Toronto, CA                  | 1           |                                             |
| NGBS164       | 2010                     | Toronto, CA                  | 1           |                                             |
| NGBS171       | 2010                     | Toronto, CA                  | 1           |                                             |
| NGBS172       | 2010                     | Toronto, CA                  | 1           |                                             |
| NGBS177       | 2010                     | Toronto, CA                  | 1           |                                             |
| NGBS180       | 2010                     | Toronto, CA                  | 1           |                                             |
| NGBS200       | 2010                     | Toronto, CA                  | 1           |                                             |
| NGBS210       | 2011                     | Toronto, CA                  | 1           |                                             |
| NGBS229       | 2011                     | Toronto, CA                  | 1           |                                             |
| NGBS234       | 2010                     | Toronto, CA                  | 1           |                                             |
| NGBS241       | 2011                     | Toronto, CA                  | 453         |                                             |
| NGBS244       | 2011                     | Toronto, CA                  | 1           |                                             |
| NGBS246       | 2011                     | Toronto, CA                  | 1           |                                             |
| NGBS267       | 2010                     | Toronto, CA                  | 1           |                                             |
| NGBS272       | 2011                     | Toronto, CA                  | 1           |                                             |
| NGBS273       | 2011                     | Toronto, CA                  | 1           |                                             |
| NGBS275       | 2010                     | Toronto, CA                  | 1           |                                             |
| NGBS279       | 2010                     | Toronto, CA                  | 1           |                                             |
| NGBS283       | 2010                     | Toronto, CA                  | 1           |                                             |
| NGBS287       | 2010                     | Toronto, CA                  | 1           |                                             |
| NGBS288       | 2010                     | Toronto, CA                  | 1           |                                             |
| NGBS298       | 2011                     | Toronto, CA                  | 1           |                                             |

|         |      |             |     |
|---------|------|-------------|-----|
| NGBS303 | 2010 | Toronto, CA | 1   |
| NGBS321 | 2011 | Toronto, CA | 1   |
| NGBS323 | 2011 | Toronto, CA | 1   |
| NGBS325 | 2011 | Toronto, CA | 1   |
| NGBS330 | 2011 | Toronto, CA | 1   |
| NGBS331 | 2011 | Toronto, CA | 1   |
| NGBS332 | 2011 | Toronto, CA | 1   |
| NGBS338 | 2011 | Toronto, CA | 1   |
| NGBS348 | 2011 | Toronto, CA | 1   |
| NGBS357 | 2011 | Toronto, CA | 1   |
| NGBS359 | 2011 | Toronto, CA | 1   |
| NGBS360 | 2011 | Toronto, CA | 1   |
| NGBS372 | 2011 | Toronto, CA | 1   |
| NGBS380 | 2011 | Toronto, CA | 1   |
| NGBS381 | 2011 | Toronto, CA | 1   |
| NGBS411 | 2011 | Toronto, CA | 1   |
| NGBS418 | 2011 | Toronto, CA | 1   |
| NGBS425 | 2011 | Toronto, CA | 1   |
| NGBS434 | 2011 | Toronto, CA | 1   |
| NGBS444 | 2011 | Toronto, CA | 1   |
| NGBS462 | 2011 | Toronto, CA | 1   |
| NGBS492 | 2012 | Toronto, CA | 1   |
| NGBS494 | 2012 | Toronto, CA | 1   |
| NGBS497 | 2012 | Toronto, CA | 1   |
| NGBS499 | 2012 | Toronto, CA | 1   |
| NGBS513 | 2012 | Toronto, CA | 1   |
| NGBS519 | 2012 | Toronto, CA | 1   |
| NGBS536 | 2012 | Toronto, CA | 1   |
| NGBS553 | 2012 | Toronto, CA | 1   |
| NGBS558 | 2012 | Toronto, CA | 1   |
| NGBS561 | 2012 | Toronto, CA | 1   |
| NGBS571 | 2012 | Toronto, CA | 1   |
| NGBS579 | 2012 | Toronto, CA | 1   |
| NGBS580 | 2012 | Toronto, CA | 1   |
| NGBS586 | 2012 | Toronto, CA | 1   |
| NGBS604 | 2012 | Toronto, CA | 1   |
| NGBS624 | 2012 | Toronto, CA | 1   |
| NGBS630 | 2012 | Toronto, CA | 1   |
| NGBS633 | 2012 | Toronto, CA | 531 |

595\_596insT RDF\_1357 (AP1\_2a encoding gene)  
1195delT RDF\_1410 (*rga*)

|         |      |                  |   |
|---------|------|------------------|---|
| SGBS001 | 1993 | Houston, TX, USA | 1 |
| SGBS002 | 1993 | Houston, TX, USA | 1 |
| SGBS003 | 1994 | Houston, TX, USA | 1 |
| SGBS004 | 1995 | Houston, TX, USA | 1 |
| SGBS005 | 1996 | Houston, TX, USA | 1 |
| SGBS006 | 1998 | Houston, TX, USA | 1 |

|         |      |                  |     |                                                      |
|---------|------|------------------|-----|------------------------------------------------------|
| SGBS007 | 1997 | Houston, TX, USA | 1   |                                                      |
| SGBS008 | 1998 | Houston, TX, USA | 1   |                                                      |
| SGBS010 | 1999 | Houston, TX, USA | 1   |                                                      |
| SGBS011 | 2000 | Houston, TX, USA | 24  |                                                      |
| SGBS012 | 2000 | Houston, TX, USA | 452 |                                                      |
| SGBS013 | 2001 | Houston, TX, USA | 1   |                                                      |
| SGBS014 | 2002 | Houston, TX, USA | 1   |                                                      |
| SGBS015 | 2003 | Houston, TX, USA | 1   |                                                      |
| SGBS016 | 2003 | Houston, TX, USA | 1   |                                                      |
| SGBS019 | 2005 | Houston, TX, USA | 26  |                                                      |
| SGBS020 | 2006 | Houston, TX, USA | 1   |                                                      |
| SGBS021 | 2007 | Houston, TX, USA | 1   |                                                      |
| SGBS022 | 2008 | Houston, TX, USA | 1   |                                                      |
| SGBS023 | 2009 | Houston, TX, USA | 86  |                                                      |
| SGBS024 | 2010 | Houston, TX, USA | 370 |                                                      |
| SGBS025 | 2010 | Houston, TX, USA | 1   |                                                      |
| SGBS026 | 2011 | Houston, TX, USA | 1   |                                                      |
| SGBS027 | 2011 | Houston, TX, USA | 1   |                                                      |
| SGBS028 | 2011 | Houston, TX, USA | 19  |                                                      |
| SGBS029 | 2011 | Houston, TX, USA | 1   |                                                      |
| SGBS030 | 2012 | Houston, TX, USA | 1   |                                                      |
| SGBS031 | 1992 | Houston, TX, USA | 1   |                                                      |
| SGBS032 | 1992 | Houston, TX, USA | 1   |                                                      |
| SGBS033 | 1994 | Houston, TX, USA | 1   |                                                      |
| SGBS034 | 1994 | Houston, TX, USA | 1   |                                                      |
| SGBS035 | 1994 | Houston, TX, USA | 1   |                                                      |
| SGBS036 | 1997 | Houston, TX, USA | 1   |                                                      |
| SGBS037 | 1997 | Houston, TX, USA | 1   |                                                      |
| SGBS038 | 1998 | Houston, TX, USA | 1   |                                                      |
| SGBS039 | 1998 | Houston, TX, USA | 1   | 435delG RDF_0659 (AP1-2a encoding gene)              |
| SGBS040 | 1998 | Houston, TX, USA | 1   |                                                      |
| SGBS041 | 1998 | Houston, TX, USA | 1   |                                                      |
| SGBS042 | 1998 | Houston, TX, USA | 1   |                                                      |
| SGBS043 | 1998 | Houston, TX, USA | 1   | Wild-type                                            |
| SGBS044 | 1999 | Houston, TX, USA | 1   |                                                      |
| SGBS045 | 1999 | Houston, TX, USA | 1   |                                                      |
| SGBS046 | 1999 | Houston, TX, USA | 1   | Y222X RDF_0655 (BP1 encoding gene)<br>E155X RDF_0315 |
| SGBS047 | 2000 | Houston, TX, USA | 1   |                                                      |
| SGBS048 | 2000 | Houston, TX, USA | 1   | 672_673insA RDF_1161 ( <i>cpsO</i> )                 |
| SGBS049 | 2000 | Houston, TX, USA | 1   |                                                      |
| SGBS050 | 2000 | Houston, TX, USA | 1   |                                                      |
| SGBS051 | 2000 | Houston, TX, USA | 1   |                                                      |
| SGBS052 | 2000 | Houston, TX, USA | 1   |                                                      |
| SGBS053 | 2000 | Houston, TX, USA | 1   |                                                      |
| SGBS054 | 2001 | Houston, TX, USA | 1   | 983delT RDF_1359 ( <i>rogB</i> )                     |
| SGBS056 | 2001 | Houston, TX, USA | 1   |                                                      |

|         |      |                  |     |           |
|---------|------|------------------|-----|-----------|
| SGBS057 | 2001 | Houston, TX, USA | 1   |           |
| SGBS058 | 2001 | Houston, TX, USA | 1   |           |
| SGBS059 | 2001 | Houston, TX, USA | 1   |           |
| SGBS060 | 2001 | Houston, TX, USA | 1   |           |
| SGBS061 | 2002 | Houston, TX, USA | 1   |           |
| SGBS062 | 2002 | Houston, TX, USA | 1   |           |
| SGBS063 | 2002 | Houston, TX, USA | 1   |           |
| SGBS064 | 2002 | Houston, TX, USA | 1   |           |
| SGBS065 | 2002 | Houston, TX, USA | 1   |           |
| SGBS066 | 2002 | Houston, TX, USA | 1   |           |
| SGBS067 | 2002 | Houston, TX, USA | 1   |           |
| SGBS068 | 2003 | Houston, TX, USA | 1   |           |
| SGBS069 | 2003 | Houston, TX, USA | 1   |           |
| SGBS070 | 2003 | Houston, TX, USA | 1   |           |
| SGBS071 | 2003 | Houston, TX, USA | 1   |           |
| SGBS072 | 2003 | Houston, TX, USA | 1   |           |
| SGBS073 | 2003 | Houston, TX, USA | 26  |           |
| SGBS074 | 2004 | Houston, TX, USA | 1   |           |
| SGBS075 | 2004 | Houston, TX, USA | 1   |           |
| SGBS076 | 2004 | Houston, TX, USA | 1   |           |
| SGBS077 | 2004 | Houston, TX, USA | 1   |           |
| SGBS078 | 2004 | Houston, TX, USA | 1   |           |
| SGBS079 | 2004 | Houston, TX, USA | 1   |           |
| SGBS080 | 2004 | Houston, TX, USA | 1   |           |
| SGBS081 | 2004 | Houston, TX, USA | 1   |           |
| SGBS082 | 2004 | Houston, TX, USA | 1   |           |
| SGBS083 | 2004 | Houston, TX, USA | 1   |           |
| SGBS084 | 2005 | Houston, TX, USA | 1   |           |
| SGBS085 | 2005 | Houston, TX, USA | 1   |           |
| SGBS086 | 2005 | Houston, TX, USA | 1   |           |
| SGBS087 | 2005 | Houston, TX, USA | 1   | Wild-type |
| SGBS088 | 2005 | Houston, TX, USA | 1   |           |
| SGBS089 | 2005 | Houston, TX, USA | 1   |           |
| SGBS090 | 2005 | Houston, TX, USA | 190 |           |
| SGBS092 | 2005 | Houston, TX, USA | 1   |           |
| SGBS093 | 2005 | Houston, TX, USA | 1   |           |
| SGBS094 | 2005 | Houston, TX, USA | 1   |           |
| SGBS095 | 2005 | Houston, TX, USA | 1   |           |
| SGBS096 | 2005 | Houston, TX, USA | 1   |           |
| SGBS097 | 2005 | Houston, TX, USA | 1   |           |
| SGBS098 | 2005 | Houston, TX, USA | 1   |           |
| SGBS099 | 2005 | Houston, TX, USA | 19  |           |
| SGBS100 | 2006 | Houston, TX, USA | 1   |           |
| SGBS101 | 2006 | Houston, TX, USA | 1   |           |
| SGBS102 | 2006 | Houston, TX, USA | 1   | Wild-type |
| SGBS103 | 2006 | Houston, TX, USA | 1   |           |
| SGBS104 | 2006 | Houston, TX, USA | 1   |           |

|         |      |                  |     |                                                  |
|---------|------|------------------|-----|--------------------------------------------------|
| SGBS105 | 2006 | Houston, TX, USA | 1   |                                                  |
| SGBS106 | 2006 | Houston, TX, USA | 1   | 433delA RDF_0654 (ape1)                          |
| SGBS107 | 2006 | Houston, TX, USA | 1   | 159delA RDF_0659 (AP1_1 encoding gene)           |
| SGBS108 | 2006 | Houston, TX, USA | 1   |                                                  |
| SGBS109 | 2006 | Houston, TX, USA | 1   |                                                  |
| SGBS110 | 2007 | Houston, TX, USA | 1   | 252_253insG RDF_1165 ( <i>cpsG</i> )             |
| SGBS111 | 2007 | Houston, TX, USA | 1   |                                                  |
| SGBS114 | 2007 | Houston, TX, USA | 1   |                                                  |
| SGBS115 | 2007 | Houston, TX, USA | 1   |                                                  |
| SGBS116 | 2007 | Houston, TX, USA | 1   |                                                  |
| SGBS117 | 2008 | Houston, TX, USA | 26  |                                                  |
| SGBS118 | 2008 | Houston, TX, USA | 1   |                                                  |
| SGBS119 | 2008 | Houston, TX, USA | 1   |                                                  |
| SGBS120 | 2008 | Houston, TX, USA | 1   |                                                  |
| SGBS121 | 2009 | Houston, TX, USA | 190 |                                                  |
| SGBS122 | 2009 | Houston, TX, USA | 1   |                                                  |
| SGBS123 | 2009 | Houston, TX, USA | 55  |                                                  |
| SGBS124 | 2009 | Houston, TX, USA | 49  |                                                  |
| SGBS125 | 2009 | Houston, TX, USA | 1   |                                                  |
| SGBS126 | 2009 | Houston, TX, USA | 1   |                                                  |
| SGBS127 | 2009 | Houston, TX, USA | 1   |                                                  |
| SGBS128 | 2009 | Houston, TX, USA | 19  |                                                  |
| SGBS129 | 2009 | Houston, TX, USA | 1   |                                                  |
| SGBS130 | 2009 | Houston, TX, USA | 19  |                                                  |
| SGBS131 | 2009 | Houston, TX, USA | 19  |                                                  |
| SGBS132 | 2009 | Houston, TX, USA | 1   |                                                  |
| SGBS133 | 2009 | Houston, TX, USA | 1   |                                                  |
| SGBS134 | 2009 | Houston, TX, USA | 452 |                                                  |
| SGBS135 | 2007 | Houston, TX, USA | 1   |                                                  |
| SGBS136 | 2007 | Houston, TX, USA | 1   |                                                  |
| SGBS137 | 2010 | Houston, TX, USA | 19  |                                                  |
| SGBS138 | 2010 | Houston, TX, USA | 1   |                                                  |
| SGBS139 | 2008 | Houston, TX, USA | 1   |                                                  |
| SGBS140 | 2008 | Houston, TX, USA | 1   |                                                  |
| SGBS141 | 2009 | Houston, TX, USA | 1   |                                                  |
| SGBS142 | 2009 | Houston, TX, USA | 1   |                                                  |
| SGBS143 | 2010 | Houston, TX, USA | 1   |                                                  |
| SGBS144 | 2010 | Houston, TX, USA | 1   |                                                  |
| SGBS145 | 2010 | Houston, TX, USA | 1   |                                                  |
| SGBS146 | 2010 | Houston, TX, USA | 1   | 751_delGAACTTTTAAATAAAC RDF_1159 ( <i>cpsK</i> ) |
| SGBS147 | 2010 | Houston, TX, USA | 1   | 940delT RDF_1357 (AP1-2a encoding gene)          |
| SGBS148 | 2011 | Houston, TX, USA | 1   | 930delT RDF_1357 (AP1-2a encoding gene)          |
| SGBS149 | 2012 | Houston, TX, USA | 19  |                                                  |
| SGBS150 | 2012 | Houston, TX, USA | 1   |                                                  |
| SGBS151 | 2012 | Houston, TX, USA | 1   |                                                  |
| SGBS152 | 2012 | Houston, TX, USA | 1   |                                                  |
| SGBS153 | 2013 | Houston, TX, USA | 26  |                                                  |



|         |      |                  |    |
|---------|------|------------------|----|
| SGBS154 | 2013 | Houston, TX, USA | 19 |
| SGBS155 | 2013 | Houston, TX, USA | 1  |

---

<sup>a</sup>Genotype refers to strains used in functional assays in figure 5

**Table S2. Examples of recombination of at least 5 kb identified in ST-1, serotype V GBS.**

| Strain  | SGBS001 Start <sup>a</sup> | SGBS001 End | SGBS001 CDS          | Length (bp) | Best BLAST hit <sup>b</sup> | Hit Start <sup>c</sup> | Hit End | Identity (%) |
|---------|----------------------------|-------------|----------------------|-------------|-----------------------------|------------------------|---------|--------------|
| SGBS060 | 1658415                    | 1674424     | RDF_1615 to RDF_1635 | 15875       | 2603V/R (V)                 | 1686219                | 1702221 | 99.94        |
| SGBS064 | 834287                     | 875209      | RDF_0812 to RDF_0851 | 40922       | NEM316 (III)                | 845210                 | 885592  | 99.92        |
| SGBS141 | 1245926                    | 1274722     | RDF_1206 to RDF_1232 | 28796       | 09mas018883 (V)             | 1217847                | 1246654 | 99.99        |
|         | 1294760                    | 1300559     | RDF_1253 to RDF_1258 | 5799        | NEM316 (III)                | 1425086                | 1430886 | 99.1         |
|         | 1310117                    | 1347812     | RDF_1270 to RDF_1304 | 37695       | 2603V/R (V)                 | 1328302                | 1362368 | 99.04        |

<sup>a</sup> Beginning and ending genome position of the reference genome (SGBS001)

<sup>b</sup> Best BLAST hit determined by blastn alignment of de novo assembled query contig against all completed GBS genomes. with serotype of identified strain noted in parentheses

<sup>c</sup> Start and end points refer to genome identified as source of recombination

**Table S3. Gene regions of strain SGBS001 > 1 kb missing from at least one serotype V, ST-1 strain**

| <b>RDF#</b>   | <b># strains affected</b> | <b>Region of difference<sup>a</sup></b> |
|---------------|---------------------------|-----------------------------------------|
| RDF_0167-0169 | 1                         | No                                      |
| RDF_0217-0229 | 1                         | Yes, 1.2                                |
| RDF_0230-0238 | 10                        | Yes, 1.2                                |
| RDF_0240-0246 | 1                         | Yes, 1.3                                |
| RDF_0407-0408 | 1                         | No                                      |
| RDF_0547-0592 | 8                         | Yes, 1.4                                |
| RDF_0948-0959 | 1                         | Yes, 5.4                                |
| RDF_1226-1234 | 2                         | Yes, 1.13                               |
| RDF_1240-1250 | 1                         | Yes, 2.6                                |
| RDF_1299-1301 | 1                         | Yes, 1.13                               |
| RDF_1440-1442 | 5                         | Yes, 1.17                               |
| RDF_1900-1906 | 1                         | Yes, 1.21                               |
| RDF_1877-1890 | 1                         | Yes, 2.6                                |
| RDF_1895-1916 | 1                         | No                                      |
| RDF_1972-1985 | 2                         | Yes, 2.9                                |
| RDF_1986-1988 | 4                         | No                                      |

<sup>a</sup>Refers to regions previously identified in Tettelin et al, PNAS 2005;102:13950-13955.

**Table S4.** Genes with significantly increased genetic variation compared to the remainder of the ST-1 core genome.

| Gene location   | Gene name   | <i>P</i> value for polymorphisms | SNPs <sup>a</sup> + Indels <sup>b</sup> (n) | NON/ SYN <sup>c</sup> | Putative function of encoded protein    |
|-----------------|-------------|----------------------------------|---------------------------------------------|-----------------------|-----------------------------------------|
| <i>rdf_0707</i> |             | 3.71E-20                         | 6                                           | 3/1                   | hypothetical protein CDS                |
| <i>rdf_1161</i> | <i>cpsO</i> | 1.26E-19                         | 19                                          | 17/0                  | Capsule synthesis protein               |
| <i>rdf_0654</i> | <i>ape1</i> | 5.25E-16                         | 20                                          | 15/2                  | Regulation of pilus 1 expression        |
| <i>rdf_1162</i> | <i>cpsN</i> | 2.10E-12                         | 15                                          | 13/2                  | Capsule synthesis protein               |
| <i>rdf_1167</i> | <i>cpsE</i> | 8.46E-10                         | 18                                          | 17/0                  | Capsule synthesis protein               |
| <i>rdf_1124</i> |             | 6.85E-09                         | 11                                          | 10/1                  | GntR family transcriptional regulator   |
| <i>rdf_0315</i> |             | 8.97E-08                         | 10                                          | 7/1                   | LuxR family response regulator          |
| <i>rdf_1131</i> |             | 5.45E-07                         | 7                                           | 3/3                   | Hypothetical protein                    |
| <i>rdf_0836</i> | <i>udk</i>  | 5.78E-07                         | 10                                          | 6/1                   | Uridine kinase                          |
| <i>rdf_1873</i> |             | 1.35E-06                         | 9                                           | 4/1                   | Hypothetical protein                    |
| <i>rdf_1166</i> | <i>cpsF</i> | 1.98E-06                         | 8                                           | 7/0                   | Capsule synthesis protein               |
| <i>rdf_1410</i> | <i>rga</i>  | 2.40E-05                         | 13                                          | 9/0                   | Regulation of pilus 2 expression        |
| <i>rdf_0863</i> | <i>glgC</i> | 6.24E-05                         | 13                                          | 7/4                   | Glucose-1-phosphate adenylyltransferase |
| <i>rdf_0652</i> |             | 1.46E-04                         | 4                                           | 1/0                   | Chaperonin                              |
| <i>rdf_0973</i> |             | 1.50E-04                         | 16                                          | 12/3                  | Oligopeptide transporter                |
| <i>rdf_1561</i> | <i>trkA</i> | 2.21E-04                         | 9                                           | 3/3                   | Potassium uptake protein                |
| <i>rdf_0257</i> |             | 2.44E-04                         | 3                                           | 3/0                   | Hypothetical protein                    |
| <i>rdf_1359</i> | <i>rogB</i> | 3.14E-04                         | 15                                          | 10/2                  | Regulation of pilus 2 expression        |
| <i>rdf_1660</i> |             | 3.77E-04                         | 7                                           | 6/0                   | Universal stress protein family         |
| <i>rdf_1181</i> | <i>estA</i> | 4.66E-04                         | 8                                           | 6/0                   | Tributylin esterase                     |
| <i>rdf_1652</i> |             | 1.26E-03                         | 7                                           | 5/0                   | Putative membrane protein               |
| <i>rdf_0497</i> |             | 1.37E-03                         | 9                                           | 2/2                   | Glutamate transport protein             |
| <i>rdf_1119</i> | <i>skzL</i> | 2.02E-03                         | 13                                          | 10/3                  | Streptokinase B                         |
| <i>rdf_0087</i> |             | 4.41E-03                         | 5                                           | 5/1                   | Hypothetical protein                    |
| <i>rdf_0314</i> |             | 5.30E-03                         | 11                                          | 4/1                   | Sensor histidine kinase                 |

|                 |             |          |    |     |                               |
|-----------------|-------------|----------|----|-----|-------------------------------|
| <i>rdf_1481</i> |             | 8.22E-03 | 10 | 5/5 | NAD-dependent oxidoreductase  |
| <i>rdf_1169</i> | <i>cpsC</i> | 1.45E-02 | 8  | 4/1 | Capsule synthesis protein     |
| <i>rdf_1309</i> |             | 2.19E-02 | 8  | 4/4 | ATP-binding transport protein |
| <i>rdf_0055</i> | <i>adhP</i> | 2.40E-02 | 10 | 5/1 | Alcohol dehydrogenase         |
| <i>rdf_0747</i> |             | 2.80E-02 | 3  | 1/0 | Hypothetical protein          |
| <i>rdf_1793</i> |             | 3.14E-02 | 11 | 9/0 | Glucuronyl hydrolase          |

---

**Table S5. Summary of RNAseq data.**

| <b>Gene</b> | <b>Fold-change<br/>in SGBS001<br/>(<i>rga-</i>)<sup>a</sup></b> | <b>Fold-change<br/>in SGBS046<br/>(<i>rdf_0315 -</i>)</b> | <b>Fold change<br/>in SGBS054<br/>(<i>rogB -</i>)</b> | <b>Fold-change<br/>in SGBS106<br/>(<i>ape1 -</i>)</b> | <b>Protein function</b>                          |
|-------------|-----------------------------------------------------------------|-----------------------------------------------------------|-------------------------------------------------------|-------------------------------------------------------|--------------------------------------------------|
| RDF_0032    | <sup>b</sup>                                                    | 0.47                                                      |                                                       |                                                       | Putative peptidase                               |
| RDF_0035    |                                                                 | 2.09                                                      |                                                       |                                                       | ABC transporter                                  |
| RDF_0054    |                                                                 | 5.69                                                      |                                                       |                                                       | Alcohol dehydrogenase                            |
| RDF_0055    |                                                                 | 3.60                                                      |                                                       |                                                       | Alcohol dehydrogenase                            |
| RDF_0117    |                                                                 | 2.02                                                      |                                                       |                                                       | Ribose transport protein                         |
| RDF_0119    |                                                                 | 2.07                                                      |                                                       |                                                       | Ribokinase                                       |
| RDF_0120    |                                                                 | 3.67                                                      |                                                       |                                                       | Ribose operon repressor                          |
| RDF_0125    |                                                                 | 0.43                                                      |                                                       |                                                       | Argininosuccinate synthase                       |
| RDF_0126    |                                                                 | 0.43                                                      |                                                       |                                                       | Argininosuccinate lyase                          |
| RDF_0191    | 0.48                                                            |                                                           |                                                       |                                                       | Dipeptide-binding ABC transporter                |
| RDF_0192    | 0.42                                                            | 0.42                                                      |                                                       | 0.47                                                  | Oligopeptide transport system permease           |
| RDF_0193    | 0.39                                                            | 0.45                                                      |                                                       | 0.48                                                  | Dipeptide transport system permease protein DppC |
| RDF_0194    | 0.41                                                            | 0.41                                                      |                                                       | 0.49                                                  | Dipeptide transport ATP-binding protein DppD     |
| RDF_0195    | 0.43                                                            | 0.49                                                      |                                                       | 0.48                                                  | Dipeptide transport ATP-binding protein DppF     |
| RDF_0231    |                                                                 |                                                           |                                                       | 2.62                                                  | conserved hypothetical protein                   |
| RDF_0232    |                                                                 |                                                           |                                                       | 2.25                                                  | Rep protein                                      |
| RDF_0233    |                                                                 |                                                           |                                                       | 2.12                                                  | FtsK/SpoIIIE family protein                      |
| RDF_0235    |                                                                 |                                                           |                                                       | 2.48                                                  | hypothetical protein                             |
| RDF_0279    |                                                                 | 2.06                                                      |                                                       |                                                       | glpK                                             |
| RDF_0421    |                                                                 | 2.36                                                      |                                                       |                                                       | nrdF-1                                           |
| RDF_0422    |                                                                 | 2.07                                                      |                                                       |                                                       | nrdI-1                                           |
| RDF_0423    |                                                                 | 2.09                                                      |                                                       |                                                       | nrdE-1                                           |
| RDF_0425    |                                                                 | 2.12                                                      |                                                       |                                                       | hypothetical protein                             |
| RDF_0438    |                                                                 | 0.26                                                      | 0.33                                                  |                                                       | AraC family transcriptional regulator            |
| RDF_0439    |                                                                 | 0.04                                                      | 0.05                                                  |                                                       | Alp3 protein                                     |
| RDF_0470    | 0.10                                                            |                                                           |                                                       |                                                       | BioY                                             |
| RDF_0471    | 0.14                                                            |                                                           |                                                       |                                                       | BioB                                             |
| RDF_0569    |                                                                 | 3.30                                                      |                                                       |                                                       | Streptococcal extracellular nuclease             |
| RDF_0580    | 4.81                                                            | 4.99                                                      | 5.00                                                  | 3.49                                                  | hypothetical protein                             |

|          |      |       |       |      |                                       |
|----------|------|-------|-------|------|---------------------------------------|
| RDF_0587 |      |       | 31.82 |      | Anti-restriction protein              |
| RDF_0658 | 2.10 |       |       |      | Pilus1a associated sortase            |
| RDF_0683 |      |       | 2.66  |      | Secreted protein                      |
| RDF_0701 |      | 2.71  |       |      | ABC transporter                       |
| RDF_0702 |      | 3.10  |       | 2.06 | Transmembrane helix protein           |
| RDF_0708 |      |       | 0.17  |      | Gluconoride permease                  |
| RDF_0758 |      | 0.46  |       |      | RibD                                  |
| RDF_0800 |      | 6.48  |       |      | Beta-glucoside anti-terminator        |
| RDF_0801 |      | 5.62  |       |      | Beta-glucoside PTS                    |
| RDF_0802 |      | 2.64  |       |      | BglA                                  |
| RDF_0809 | 3.15 | 4.52  | 2.36  | 2.69 | hypothetical protein                  |
| RDF_0810 | 2.22 | 2.51  |       |      | NagB                                  |
| RDF_0816 | 3.06 | 2.61  | 3.60  | 2.80 | Hydrolase                             |
| RDF_0907 | 2.14 |       |       |      | hypothetical protein                  |
| RDF_0908 |      | 0.45  |       |      | Nucleoside diphosphate kinase         |
| RDF_1009 |      | 2.37  |       |      | Autolysis regulator LytR              |
| RDF_1080 |      | 0.46  |       |      | GuaC                                  |
| RDF_1135 |      | 0.36  |       | 2.00 | Sodium/glycine symporter              |
| RDF_1353 |      | 17.96 | 12.85 | 4.16 | Pilus 2a accessory protein 2          |
| RDF_1354 |      | 19.72 | 15.36 | 4.14 | Pilus 2a associated sortase           |
| RDF_1355 |      | 26.17 | 18.45 | 4.23 | Pilus 2a associated sortase           |
| RDF_1356 |      | 17.92 | 12.23 | 4.91 | Pilus 2a backbone protein             |
| RDF_1357 |      | 34.89 | 29.74 | 6.60 | Pilus 2a accessory protein 1          |
| RDF_1409 | 0.08 |       | 4.91  |      | Srr-1 protein                         |
| RDF_1410 | 2.04 |       | 3.00  |      | Rga protein                           |
| RDF_1471 |      | 2.06  |       |      | Permease protein                      |
| RDF_1489 | 2.14 |       |       |      | hypothetical protein                  |
| RDF_1490 | 2.37 |       |       |      | hypothetical protein                  |
| RDF_1491 | 2.08 |       |       |      | hypothetical protein                  |
| RDF_1509 |      | 10.06 |       |      | hypothetical protein                  |
| RDF_1510 |      | 10.49 |       |      | ABC transporter                       |
| RDF_1511 |      | 11.17 |       |      | Branched chain amino acid transporter |
| RDF_1512 |      |       | 2.15  |      | Branched chain amino acid transporter |
| RDF_1513 | 3.71 | 2.23  | 5.62  | 2.94 | Branched chaing amino acid permease   |

|          |       |       |                                                                             |
|----------|-------|-------|-----------------------------------------------------------------------------|
| RDF_1567 | 4.71  | 2.29  | Adh2                                                                        |
| RDF_1578 |       | 0.05  | PEP-dihydroxyacetone PTS                                                    |
| RDF_1579 |       | 0.05  | PEP-dihydroxyacetone PTS                                                    |
| RDF_1580 |       | 0.04  | PEP-dihydroxyacetone PTS                                                    |
| RDF_1581 |       | 0.07  | GlpF-2                                                                      |
| RDF_1691 |       | 0.48  | CAMP factor                                                                 |
| RDF_1709 |       | 2.26  | Acid phosphatase                                                            |
| RDF_1739 | 0.39  | 0.44  | Glycine transporter                                                         |
| RDF_1740 | 0.44  | 0.42  | Glycine transporter                                                         |
| RDF_1742 |       | 9.44  | Xfp protein                                                                 |
| RDF_1743 |       | 7.41  | L-ascorbate-6-phosphatase                                                   |
| RDF_1747 |       | 2.76  | hypothetical protein                                                        |
| RDF_1752 |       | 4.52  | Transaldolase                                                               |
| RDF_1753 |       | 5.27  | L-ribulose-5-phosphate-4-epimerase                                          |
| RDF_1754 |       | 6.38  | L-xyulose-5-phosphate-3-epimerase                                           |
| RDF_1755 |       | 10.50 | 3.19 3-keto-L-gulonate 6-phosphate decarboxylase CDS                        |
| RDF_1756 |       | 11.20 | Ascorbate-specific PTS system, EIIA component                               |
| RDF_1757 |       | 10.62 | Ascorbate-specific PTS system, EIIB component                               |
| RDF_1758 |       | 19.35 | 2.26 Ascorbate-specific PTS system                                          |
| RDF_1762 |       | 3.46  | PfoR                                                                        |
| RDF_1764 |       | 2.55  | Mobile element protein                                                      |
| RDF_1774 |       |       | 2.43 Transcriptional regulator CtsR                                         |
| RDF_1790 |       | 2.37  | PTS system, N-acetylgalactosamine-specific IID component                    |
| RDF_1792 |       | 2.56  | PTS system, N-acetylgalactosamine-specific IIB component                    |
| RDF_1794 |       | 2.58  | PTS system, N-acetylgalactosamine- and galactosamine-specific IIA component |
| RDF_1795 |       | 4.14  | 2-deoxy-D-gluconate 3-dehydrogenase                                         |
| RDF_1796 |       | 3.88  | predicted 4-deoxy-L-threo-5-hexosulose-uronate ketol-isomerase              |
| RDF_1797 |       | 3.68  | 2-dehydro-3-deoxygluconate kinase                                           |
| RDF_1798 |       | 3.64  | Eda-2                                                                       |
| RDF_1820 |       | 2.00  | LacC                                                                        |
| RDF_1840 |       | 3.54  | PTS system, mannose-specific IID component                                  |
| RDF_1841 |       | 4.58  | PTS system, mannose-specific IIC component                                  |
| RDF_1842 |       | 4.19  | PTS system, mannose/fructose family IIB component                           |
| RDF_1855 | 11.89 |       | Exodeoxyribonuclease III                                                    |



|          |       |       |       |       |                                    |
|----------|-------|-------|-------|-------|------------------------------------|
| RDF_1856 | 14.41 | 2.64  |       |       | Maltose-glucose PTS                |
| RDF_1881 |       | 2.17  |       |       | hypothetical protein               |
| RDF_1887 | 5.72  |       |       |       | ESAT-6/Esx family secreted protein |
| RDF_1925 | 3.67  | 3.21  |       | 3.09  | BibA protein                       |
| RDF_1977 |       |       | 3.37  |       | hypothetical protein               |
| RDF_1978 |       |       | 3.26  |       | FtsK/SpoIIIE family protein        |
| RDF_1979 |       |       | 2.98  |       | hypothetical protein CDS           |
| RDF_1980 |       |       | 4.65  |       | Replication protein repB           |
| RDF_1992 |       | 2.14  |       |       | Two-component response regulator   |
| RDF_1998 |       | 0.46  |       |       | hypothetical protein               |
| RDF_1999 |       | 0.40  |       | 0.49  | Phage infection protein            |
| RDF_2006 |       |       | 2.33  |       | hypothetical protein               |
| RDF_2013 |       |       | 4.27  |       | hypothetical protein               |
| RDF_2017 | 36.64 | 43.77 | 28.29 | 31.36 | Phage anti-repressor protein       |
| RDF_2033 | 0.35  | 0.27  |       |       | Immuodominant antigen A protein    |
| RDF_2034 | 0.21  | 0.12  |       |       | Aggregation promoting factor       |
| RDF_2049 |       | 6.28  |       |       | arcA                               |
| RDF_2050 |       | 5.92  |       |       | Acetyltransferase                  |
| RDF_2051 |       | 5.61  |       |       | argF-2                             |
| RDF_2052 |       | 6.61  |       |       | arcD                               |
| RDF_2053 |       | 6.47  |       |       | arcC-2                             |

<sup>a</sup>Numbers indicate fold change in transcript level relative to strain SGBS102.

<sup>b</sup>Absence of number indicates transcript level was not significantly different for that particular gene in indicated strain relative to strain SGBS102.
